# Supplementary material for: Polyoxometalate–anatase TiO2 composites are introduced into the photoanode of dye-sensitized solar cells to retard the recombination and increase the electron lifetime
Source: Royal Society of Chemistry journal article supplement (doi:10.1039/c2dt32403b), 2012-12-11
Supplement: c2dt32403b.pdf [file c2dt32403b.pdf]

## Supporting information

### **Polyoxometalate-anatase TiO<sub>2</sub> composite introduced into the photoanode of the dye-sensitized solar cells to retard the recombination and increase the electron lifetime**

**Shi-Ming Wang, Lin Liu, Wei-Lin Chen,\* En-Bo Wang\***

*Department of Chemistry, Key Laboratory of Polyoxometalates Science of Ministry of Education, Northeast Normal University, Changchun, 130024, China. Fax: (+86) 431-85098787, E-mail: wangeb889@nenu.edu.cn, wangeb889@yahoo.com.cn, chenwl@nenu.edu.cn*

## Experimental

**Materials:** N719, Degussa P25 and FTO glass ( $14 \Omega/\square$ , Nippon Sheet Glass) were purchased from Heptachroma (Dalian, China). Titanium tetra-isopropoxide, DMPII, LiI (99.9%),  $I_2$  (99%), tert-butylpyridine (TBP) (97%) were purchased from Aladdin.  $H_3PW_{12}O_{40} \cdot nH_2O$  and the other reagents were purchased from Beijing Chemicals Co. Ltd. are of analytical grade and used as received without further purification.

**Characterization:** The photovoltaic tests of the DSSCs were carried out by measuring the photocurrent–voltage ( $J$ – $V$ ) characteristics of the devices under AM 1.5 simulated solar illumination at  $100 \text{ mW cm}^{-2}$ . Open circuit voltage decay (OCVD) and EIS measurements were performed on CS350 electrochemistry station (Wuhan CorrTest<sup>®</sup> Instrument Corporation, China) with a Xe lamp and an AM 1.5 solar filter. A 100W Xe arc lamp (XQ-500W, Beijing Changtuo Device, P.R.China) was used under ambient conditions. IR spectra were recorded in the range of  $400 - 4000 \text{ cm}^{-1}$  on an Alpha Centaur FT/IR Spectrophotometer on the Si substrate. TG analyses was performed on a Perkin–Elmer TGA7 instrument under air condition with a heating rate of  $10 \text{ }^\circ\text{C} \cdot \text{min}^{-1}$ . X-ray diffraction pattern (XRD) was measured using a Rigaku D/max-IIB X-ray diffractometer with Cu  $K\alpha$  radiation ( $\lambda=1.5418 \text{ \AA}$ ). High resolution transmission electron microscope (HRTEM) image was taken on a JEOL-2100F transmission electron microscope with an accelerating voltage of 200 kV.

**Sol-gel method of the synthesis  $PW_{12}TiO_2$ :** Titaniumtetraisopropoxide (TTIP, 98%, 6ml) was dissolved with 30ml of iso-propyl alcohol while stirring was used. In another container,  $H_3PW_{12}O_{40}$  (0.4 g) was dissolved with water (0.8ml), and then added into the TTIP solution drop by drop. The resulting mixture was adjusted to pH 1–2 by addition of  $8 \text{ mol L}^{-1}$  HCl, and then stirred at room temperature for 1 h. Then, the mixture was heated to  $50^\circ\text{C}$  until homogeneous  $H_3PW_{12}O_{40}/TiO_2$  hydrogel formed. This hydrogel was transferred into a 50mL autoclave, and then heated to  $200^\circ\text{C}$  at a heating rate of about  $2^\circ\text{C min}^{-1}$ . Finally, the temperature was kept at  $200^\circ\text{C}$  for 1 h. After cooling the hydrogel to room temperature, the hydrogel was dehydrated slowly at  $50^\circ\text{C}$  in a vacuum for 24 h. The dried gel was washed with hot water three times and absolute alcohol once, and then dried at room temperature. The product is white powder. Elemental Anal. for  $PW_{12}$ -anatase  $TiO_2$  composite: P, 0.18%; W, 12.78%. The amount of  $H_3PW_{12}O_{40}$  doped in  $TiO_2$  was 16.98% calculated based on W.

**The preparation of the photoanode paste and the fabrication of DSSCs:** The  $TiO_2$  powder was a mixture of the  $PW_{12}$ -anatase  $TiO_2$  composite and pure P25 by the mass ratio of 1:3, 1:5 and 1:7. The paste for screen printing was prepared according to the literature using different  $TiO_2$  powder. Before the screen printing process, the FTO was

immersed in 40mmol L<sup>-1</sup> TiCl<sub>4</sub> aqueous solution at 70°C for 30 min to form a compact layer. A layer of paste was coated on the FTO glass plates by screen-printing. The screen printing procedure was repeated (layer of 2 μm) with TiO<sub>2</sub> paste to obtain a transparent nanocrystalline film of thickness around 8 μm and area of 0.36 cm<sup>2</sup>. The TiO<sub>2</sub> electrodes were gradually heated in an electric stove in an air atmosphere. The temperature gradient program has four levels at 325°C (5 min), 375°C (5min), 450°C (15min) and 500°C (15min).

The calcined photoanodes were sensitized for 24 hours in N719 dye solution. The sensitized photoanodes were washed with ethanol to remove unanchored dye molecules and subsequently dried by nitrogen at room temperature. Platinum-sputtered FTO glass was used as the counter electrode. A drop of electrolyte solution [0.6M DMPII, 0.05M I<sub>2</sub>, 0.1M LiI and 0.5M tert-butylpyridine in a mixture of acetonitrile–valeronitrile (85: 15, v/v)] was injected into the cell.

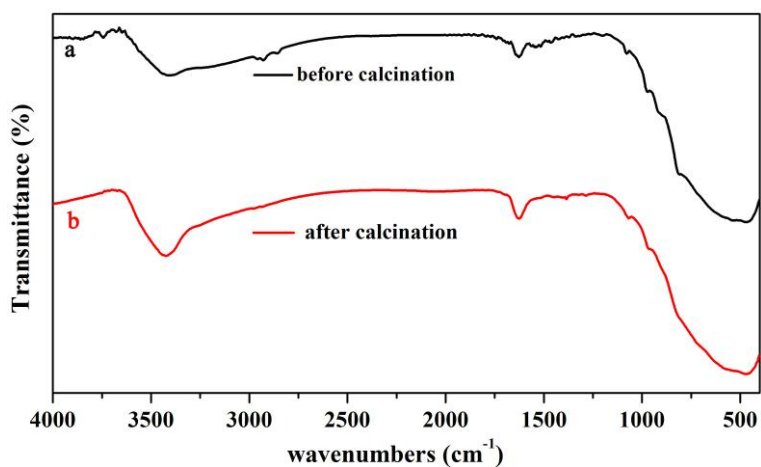

**Fig. S1** the IR spectrum of the PW<sub>12</sub>-anatase TiO<sub>2</sub> composite before calcination (a) and after calcination (b).

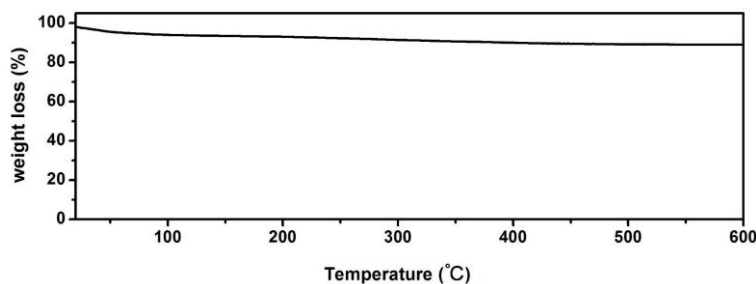

**Fig. S2** the TG curves of the PW<sub>12</sub>-anatase TiO<sub>2</sub> composite.

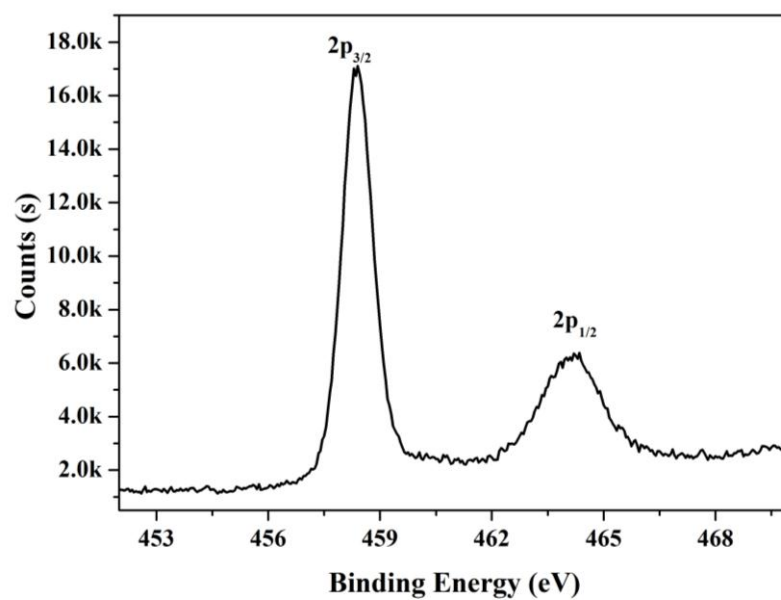

**Fig. S3** The Ti2p XPS spectrum of the PW<sub>12</sub>-anatase TiO<sub>2</sub> composite.

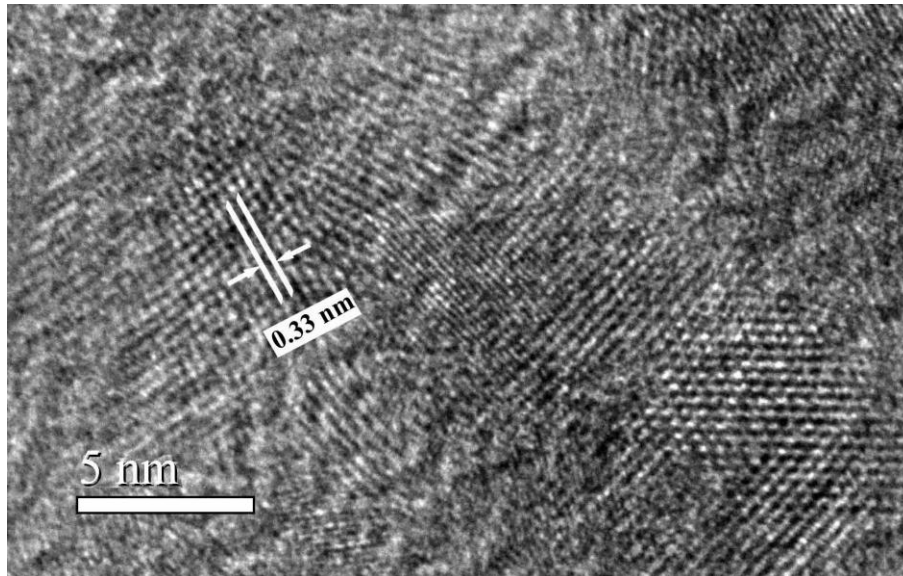

**Fig. S4.** HRTEM image of PW<sub>12</sub>-anatase TiO<sub>2</sub> composite. TiO<sub>2</sub> is well crystallized with a lattice spacing of 0.33 nm.
